# Supplementary material for: Difference of Liver and Kidney Metabolic Profiling in Chronic Atrophic Gastritis Rats between Acupuncture and Moxibustion Treatment
Source: Hindawi journal article supplement (doi:10.1155/2018/6030929), 2018-01-01
Supplement: f1 [file 6030929.f1.zip]

## Difference of liver and kidney metabolic profiling in chronic atrophic gastritis rats between acupuncture and moxibustion treatment

Qi-da He<sup>1,2</sup>; Yuan-peng Huang<sup>†1</sup>; Li-bing Zhu<sup>1</sup>; Jia-cheng Shen<sup>1</sup>; Lin-yu Lian<sup>1,2</sup>; Yuan Zhang<sup>1,3</sup>; Long-bin, Zhang<sup>1</sup>; Lin-chao Qian<sup>1</sup>; Xian-jun Meng<sup>1</sup>; Mi Liu<sup>3</sup>; Cai-chun Liu<sup>1\*</sup>; Zong-bao Yang<sup>1\*</sup>

<sup>1</sup>Department of Traditional Chinese Medicine, Zhongshan hospital and Shenzhen Research Institute, Xiamen University, Xiamen 361005, China

<sup>2</sup>College of Acupuncture and Moxibustion, Fujian university of Traditional Chinese Medicine, Fuzhou 350122, China

<sup>3</sup>College of Acupuncture and Moxibustion, Hunan university of Traditional Chinese Medicine, Changsha 410208, China

\*Correspondence and requests for materials should be addressed to Zong-bao Yang ( yzbldq@163.com.cn ) and Cai-chun Liu (caichunliu714@g mail.com )

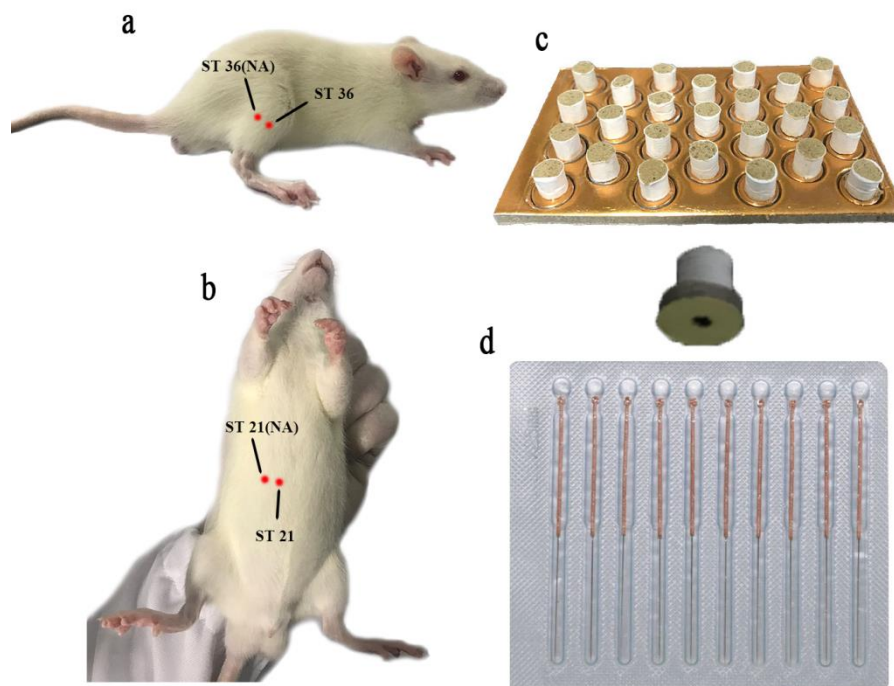

Figure.S1 The location of acupoints and corresponding non-acupoints for Zusanli (ST 36, located 5 mm below the fibular head and lateral to the anterior tubercle of the tibia) on rats (a); The

location of acupoints and corresponding non-acupoints for Liangmen (ST 21, located 5 mm horizontally to the spot above 2cm from navel) on rats(b); moxa cones(c); tainless-steel acupuncture needles(d).

**Table.S1** Gastric mucosa thickness of rats in the six groups (mean  $\pm$ S.D).

| Group          | Control            | CAG                             | EA                              | EN                 | MA                              | MN                              |
|----------------|--------------------|---------------------------------|---------------------------------|--------------------|---------------------------------|---------------------------------|
| mean $\pm$ S.D | 587.59 $\pm$ 19.59 | 307.00 $\pm$ 11.82 <sup>▲</sup> | 497.09 $\pm$ 14.08 <sup>Δ</sup> | 423.07 $\pm$ 75.35 | 524.73 $\pm$ 47.79 <sup>Δ</sup> | 449.06 $\pm$ 39.62 <sup>Δ</sup> |

<sup>a</sup> compare to the controls, the thickness of the gastric mucosa of CAG rats was thinner significantly ( $p < 0.05$ ), indicating the CAG modeling was successfully replicated. In addition, for rats in EA group, MA group and MN group, the thickness of gastric mucosa was thicker than that of CAG rats ( $p < 0.05$ ), while the thickness of gastric mucosa of rats in EN group has no significant difference, illustrating that both electro-acupuncture and moxibustion could improve the thickness of gastric mucosa in CAG rats effectively. (▲ indicates a statistical significance  $p < 0.05$  when compared with the control group. Δ indicates a statistical significance  $p < 0.05$  when compared with the CAG group)

Each of liver and kidney tissue sample (weighed 200 mg) were homogenated in mixture of 300 mL H<sub>2</sub>O and 600 mL CH<sub>3</sub>OH and then vortexed for 1 min. After partitioning on ice for 10 min, the samples were centrifuged for 10 min (10000 rpm, 4 °C). The upper supernatant from each sample was lyophilized and mixed with 600  $\mu$ L D<sub>2</sub>O containing sodium 3-trimethylsilyl-(2, 2, 3, 3-d<sub>4</sub>)-1-propionate (TSP, 1 mM ). Finally, a 500  $\mu$ L of mixture was collected into 5 mm NMR tube for NMR analysis. For better metabolite identification, the two-dimensional (2D) NMR spectra including including <sup>1</sup>H-<sup>1</sup>H correlation spectroscopy (COSY) and <sup>1</sup>H-<sup>13</sup>C heteronuclear single quantum coherence (HSQC) for the liver and kidney sample was also captured. <sup>1</sup>H NMR spectra of all samples were acquired by a Bruker 600 MHz spectrometer at 298 K. 1D <sup>1</sup>H spectra were conducted with a Nuclear Overhauser Effect Spectroscopy (NOESY, RD-901-t1-90 °tm-90 °-acquire) pulse sequence. For all samples, 64 FIDs were collected into 64K data points over a spectral width of 12 000 Hz with a relaxation delay of 6.5  $\mu$ s. The COSY spectra was obtained with a relaxation delay of 1.5s, and 48 transients were collected into 1024 data points with a

spectral width of 12 ppm for both dimensions. In 2D  $^1\text{H}$ - $^{13}\text{C}$  HSQC spectra, a 1.5 s relaxation delay was used for water suppression by presaturation. Additionally, for every 2D spectrum, 2048 $\times$ 128 data points were collected using 8 scans per increment. The spectral widths were set to 12 and 240 ppm in the proton and carbon dimensions, respectively.

The metabolites in NMR spectra from all samples were assigned according to published literatures,<sup>12,18</sup> our own developed NMR database and HMDB database (<http://www.hmdb.ca/>).

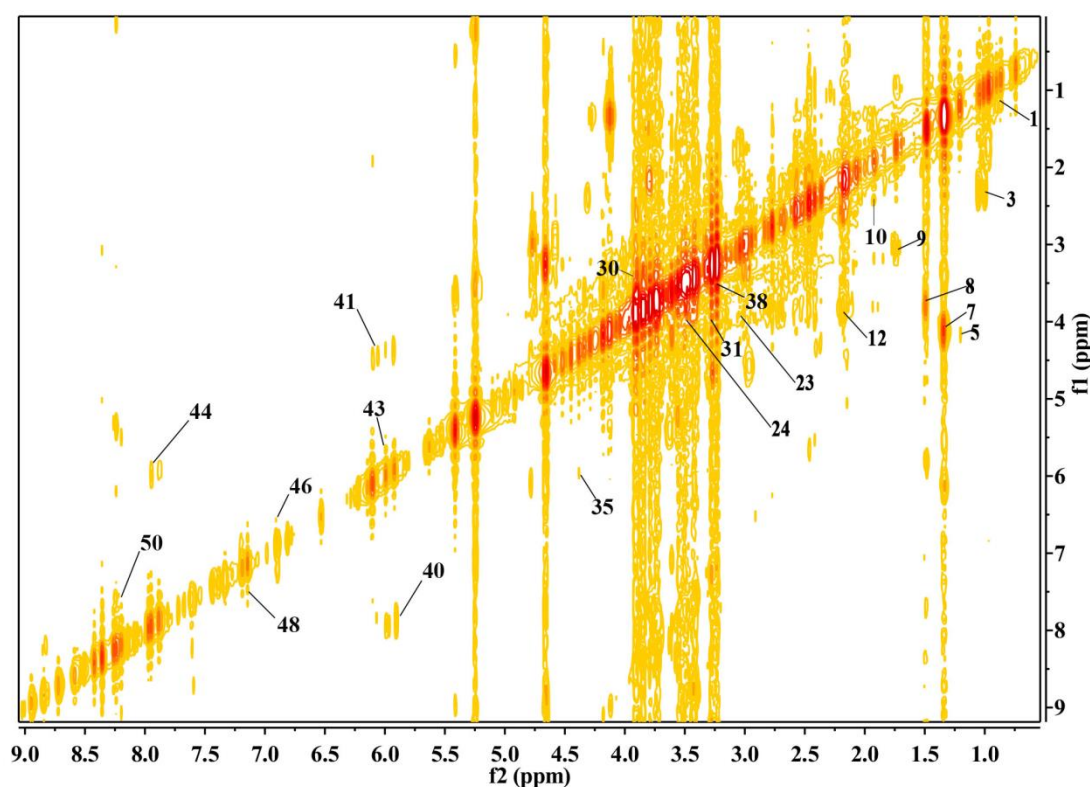

**Figure.S2.** Portion of the  $^1\text{H}$ - $^1\text{H}$  COSY 600 MHz spectrum of liver metabolites. Identified metabolites: 1, Isoleucine; 3,Valine; 5,3-Hydroxybutyrate; 7,Lactate; 8,Alanine;9, Lysine; 10,Acetate; 12,Glutamine; 23,Ethanolamine; 24,Choline; 30,Betaine; 31, Inositol; 35,Adenosine; 38,Glycogen; 40,Uridine; 41,Inosine; 43,Uridine; 44,Cytidine; 46,Tyrosine; 48,Tryptophan; 50, Nicotinamide.

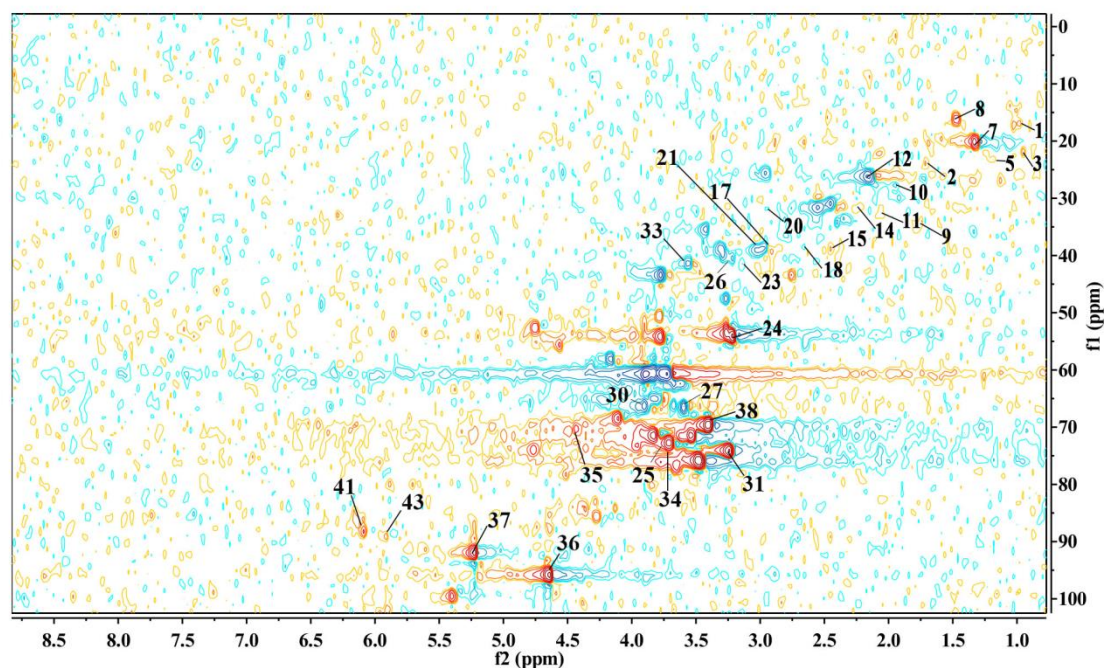

**Figure.S3.** Portion of the  $^1\text{H}$ - $^{13}\text{C}$  HSQC 600 MHz spectrum of liver metabolites. Identified metabolites: 1, Isoleucine; 3,Valine; 5,3-Hydroxybutyrate; 7, Lactate; 8, Alanine; 9, Lysine; 10, Acetate; 11, Glutamate; 12, Glutamine; 14, Glutathione; 15, Succinate; 18, Dimethylamine; 20, N-methylhydantoin; 21, Creatine; 23,Ethanolamine; 24,Choline; 25, Phosphocholine; 26,Taurine; 27,Glycerophosphocholine; 30, Betaine; 31, Inositol; 34,Glycerol; 35,Adenosine; 36, $\beta$ -glucose; 37, $\alpha$ -glucose; 38,Glycogen; 41,Inosine; 43,Uridine.

**Table S2** Peak attribution of the main marked metabolites in  $^1\text{H}$ -NMR spectra of liver sample

| NO. | Metabolites       | $\delta^1\text{H}/\text{ppm}$ | Moieties                                           | $\delta^{13}\text{C}/\text{pm}$ | Assigned with |
|-----|-------------------|-------------------------------|----------------------------------------------------|---------------------------------|---------------|
| 1   | Isoleucine        | 0.94(t); 1.01(d)              | $\delta\text{-CH}_3$ ; $\beta\text{-CH}_3$         | 17.13                           | COSY,HSQC     |
| 2   | Leucine           | 0.96(t); 1.70(m)              | $\text{CH}_3$ ; $\text{CH}_2$ & $\gamma\text{-CH}$ | 23.57                           | HSQC          |
| 3   | Valine            | 0.99(d); 1.04(d)              | $\gamma\text{-CH}_3$ ; $\gamma\text{-CH}_3$        | 21.77                           | COSY,HSQC     |
| 5   | 3-Hydroxybutyrate | 1.21(d)                       | $\gamma\text{CH}_3$                                | 23.09                           | COSY,HSQC     |
| 7   | Lactate           | 1.33(d); 4.11(q)              | $\text{CH}_3$ ; CH                                 | 20.41                           | COSY,HSQC     |
| 8   | Alanine           | 1.48(d); 3.78(q)              | $\text{CH}_3$ ; CH                                 | 18.03                           | COSY,HSQC     |
| 9   | Lysine            | 1.73(m), 3.02(t)              | $\beta\text{CH}_2$ , $\delta\text{CH}_2$           | 32.37                           | COSY,HSQC     |
| 10  | Acetate           | 1.92(s)                       | $\text{CH}_3$                                      | 26.41                           | HSQC          |
| 11  | Glutamate         | 2.05(m)                       | $\beta\text{-CH}$                                  | 32.87                           | HSQC          |
| 12  | Glutamine         | 2.13(m),3.77(t)               | $\beta\text{CH}_2$ , $\gamma\text{CH}_2$           | 26.75                           | COSY,HSQC     |

|    |                       |                                          |                                                       |       |            |
|----|-----------------------|------------------------------------------|-------------------------------------------------------|-------|------------|
| 14 | Glutathione           | 2.16 (m),2.55 (m)                        | $\beta$ -CH <sub>2</sub> ; $\gamma$ -CH <sub>2</sub>  | 31.32 | HSQC       |
| 15 | Succinate             | 2.41(s)                                  | CH                                                    | 38.02 | HSQC       |
| 18 | Dimethylamine         | 2.72 (s)                                 | CH <sub>3</sub>                                       | 37.92 | HSQC       |
| 20 | N-methylhydantoin     | 2.92 (s),4.08 (s)                        | CH <sub>3</sub> ,CH <sub>2</sub>                      | 31.02 | HSQC       |
| 23 | Ethanolamine          | 3.13 (d)                                 | CH <sub>2</sub>                                       | 42.09 | HSQC       |
| 24 | Choline               | 3.20(s);3.52(m);4.07(m)                  | CH <sub>3</sub> ;N-CH <sub>2</sub> ;O-CH <sub>2</sub> | 54.92 | HSQC       |
| 25 | Phosphocholine        | 3.22(s);3.59(m);                         | CH <sub>3</sub> ; N-CH <sub>2</sub> ;                 | 72.25 | HSQC       |
| 26 | Phosphoethanolamine   | 3.23(t);                                 | NCH <sub>2</sub> ;                                    | 40.26 | HSQC       |
| 27 | Glycerophosphocholine | 3.68(m);                                 | N-CH <sub>2</sub> &HO-CH <sub>2</sub> ;               | 65.69 | HSQC       |
| 30 | Betaine               | 3.27(s); 3.89(s)                         | CH <sub>3</sub> ; CH <sub>2</sub>                     | 65.56 | COSY,HSQC  |
| 31 | Inositol              | 3.28(t);3.54(dd);                        | CH(2); CH(4, 6);                                      | 74.45 | COSY, HSQC |
| 33 | Glycine               | 3.56 (s)                                 | CH <sub>2</sub>                                       | 42.20 | HSQC       |
| 34 | Glycerol              | 3.64 (m); 3.77 (m)                       | CH <sub>2</sub> ; CH                                  | 73.36 | HSQC       |
| 35 | Adenosine             | 4.45(t),6.10(d),8.25(s),8.3<br>5(s)      | 3-C'H,1-C'H,8-CH,<br>2-CH                             | 70.79 | COSY, HSQC |
| 36 | $\beta$ -glucose      | 4.63 (d)                                 | 1-CH                                                  | 95.28 | HSQC       |
| 37 | $\alpha$ -glucose     | 5.23 (d)                                 | 1-CH                                                  | 92.31 | HSQC       |
| 38 | Glycogen              | 3.40(m)                                  | 1-CH                                                  | 69.58 | COSY, HSQC |
| 39 | Allantoin             | 5.39(s)                                  | CH                                                    |       |            |
| 40 | Uridine               | 5.91(d);7.87(d)                          | CH(2);CH(11)                                          |       | COSY       |
| 41 | Inosine               | 6.09 (d)                                 | 1-CH                                                  | 90.18 | COSY, HSQC |
| 42 | Uracil                | 5.80(d); 7.53(d)                         | CH(5); CH(6)                                          |       |            |
| 43 | Guanosine             | 5.90(s);                                 | CH(2);                                                | 89.16 | COSY, HSQC |
| 44 | Cytidine              | 6.06(d); 7.84(d)                         | CH(2); CH(11)                                         |       | COSY       |
| 45 | Fumarate              | 6.52s)                                   | CH                                                    |       |            |
| 46 | Tyrosine              | 6.89(d); 7.19(d)                         | m-CH; o-CH                                            |       | COSY       |
| 48 | Tryptophan            | 7.19(m);7.31(s);7.60(m);                 | CH(8);CH(6);CH(7)                                     |       | COSY       |
| 50 | Nicotinamide          | 7.59(dd);8.24(dd);8.72(dd<br>) ; 8.94(s) | CH(5);CH(4);CH(6)<br>; CH(2)                          |       | COSY       |

|    |               |                  |              |
|----|---------------|------------------|--------------|
| 52 | Hypoxanthine  | 8.19(s); 8.21(s) | CH(2); CH(7) |
| 54 | Formate       | 8.46(s)          | CH           |
| 55 | Glucaric acid | 3.95(t)          | CH(8)        |

<sup>a</sup> Multiplicity for <sup>1</sup>H resonances: s: single; d: doublet; t: triplet; q: quartet; m: multiplet.

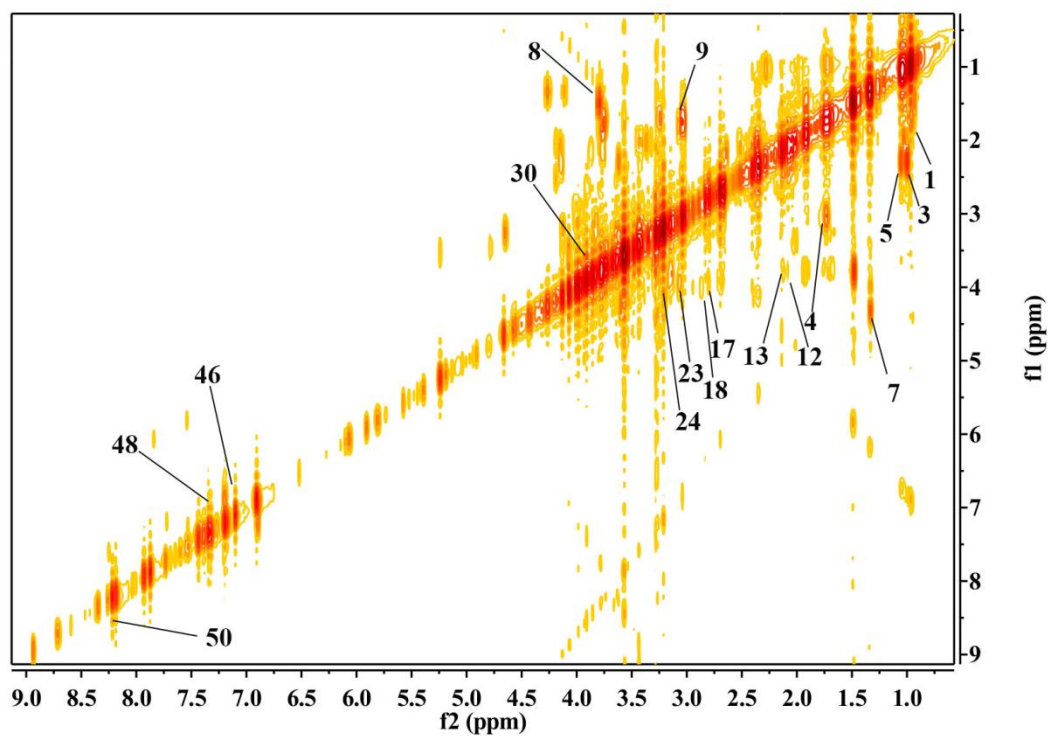

**Figure.S4.** Portion of the <sup>1</sup>H-<sup>1</sup>H COSY 600 MHz spectrum of kidney metabolites. Identified metabolites: 1, Isoleucine; 3, Valine; 4, Ornithine; 5, 3-Hydroxybutyrate; 7, Lactate; 8, Alanine; 9, Lysine; 17, Aspartate; 18, Dimethylamine; 23, Ethanolamine; 24, Choline; 30, Betaine; 46, Tyrosine; 48, Tryptophan; 50, Nicotinamide.



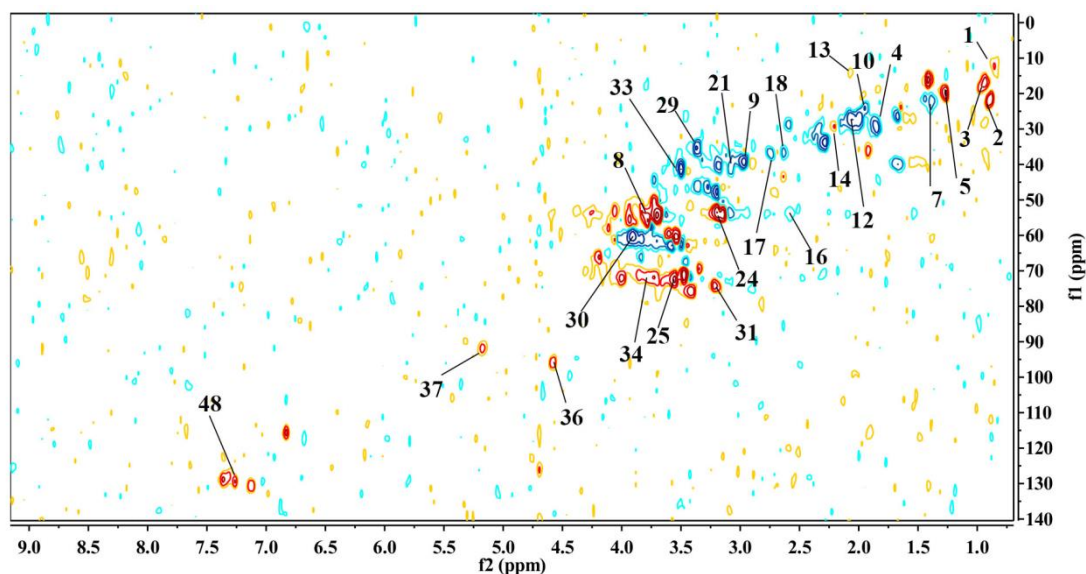

**Figure.S5.** Portion of the  $^1\text{H}$ - $^{13}\text{C}$  HSQC 600 MHz spectrum of kidney metabolites. Identified metabolites: 1, Isoleucine; 2, Leucine; 3, Valine; 4, Ornithine; 5, 3-Hydroxybutyrate; 7, Lactate; 8, Alanine; 9, Lysine; 10, Acetate; 12, Glutamine; 13, Methionine; 14, Glutathione; 16, Citrate (M); 17, Aspartate; 18, Dimethylamine; 21, Creatine; 24, Choline; 25, Phosphocholine; 30, Betaine; 31, Inositol; 33, Glycine; 34, Glycerol; 36,  $\beta$ -glucose; 37,  $\alpha$ -glucose; 48, Tryptophan.

**Table.S3**  $^1\text{H}$ -NMR data and assignments of the metabolites in kidney aqueous extracts

| NO. | Metabolites       | $\delta^1\text{H/ppm}$ | Moieties                                           | $\delta^{13}\text{C/ppm}$ | Assigned with |
|-----|-------------------|------------------------|----------------------------------------------------|---------------------------|---------------|
| 1   | Isoleucine        | 0.94(t)                | $\delta\text{-CH}_3$                               | 13.81                     | COSY, HSQC    |
| 2   | Leucine           | 0.96(t); 1.70(m)       | $\text{CH}_3$ ; $\text{CH}_2$ & $\gamma\text{-CH}$ | 25.51                     | HSQC          |
| 3   | Valine            | 0.99(d); 1.04(d)       | $\gamma\text{-CH}_3$ ; $\gamma\text{-CH}$ 3        | 22.90                     | COSY, HSQC    |
| 4   | Ornithine         | 1.73(m)                | $\delta\text{CH}_2$                                | 25.81                     | COSY, HSQC    |
| 5   | 3-Hydroxybutyrate | 1.21(d)                | $\gamma\text{CH}_3$                                | 21.40                     | COSY, HSQC    |
| 7   | Lactate           | 1.33(d); 4.11(q)       | $\text{CH}_3$ ; $\text{CH}$                        | 20.27                     | COSY, HSQC    |
| 8   | Alanine           | 1.48(d); 3.78(q)       | $\text{CH}_3$ ; $\text{CH}$                        | 54.58                     | COSY, HSQC    |
| 9   | Lysine            | 1.73(m); 3.02(t)       | $\beta\text{CH}_2$ ; $\delta\text{CH}_2$           | 39.93                     | COSY, HSQC    |
| 10  | Acetate           | 1.92(s)                | $\text{CH}_3$                                      | 25.83                     | HSQC          |
| 11  | Glutamate         | 2.05(m)                | $\beta\text{-CH}$                                  |                           |               |
| 12  | Glutamine         | 2.13(m); 3.77(t)       | $\beta\text{CH}_2$ ; $\gamma\text{CH}_2$           | 28.28                     | COSY, HSQC    |
| 13  | Methionine        | 2.14(s) ; 2.65(t)      | $\gamma\text{CH}_2$ ; $\text{S-CH}_3$              | 14.58                     | COSY, HSQC    |

|    |                        |                         |                                                       |       |            |
|----|------------------------|-------------------------|-------------------------------------------------------|-------|------------|
| 14 | Glutathione            | 2.16 (m);2.55 (m)       | $\beta$ -CH <sub>2</sub> ; $\gamma$ -CH <sub>2</sub>  | 29.58 | HSQC       |
| 15 | Succinate              | 2.41(s)                 | CH                                                    |       |            |
| 16 | Citrate (M)            | 2.54(d);2.67(d)         | CH <sub>2</sub> ;CH <sub>2</sub>                      | 53.55 | HSQC       |
| 17 | Aspartate              | 2.69(dd);2.82(dd)       | $\beta$ CH <sub>2</sub> ; $\beta$ CH <sub>2</sub>     | 35.95 | COSY,HSQC  |
| 18 | Dimethylamine          | 2.72 (s)                | CH <sub>3</sub>                                       | 36.69 | HSQC       |
| 19 | Asparagine             | 2.88(dd);2.96(dd)       | $\beta$ CH <sub>2</sub> ; $\beta$ CH <sub>2</sub>     |       | COSY       |
| 21 | Creatine               | 3.04(s);3.94(s)         | CH <sub>3</sub> ,CH <sub>2</sub>                      | 38.55 | HSQC       |
| 22 | Creatinine             | 3.05(s);4.06(s)         | CH <sub>3</sub> ;CH <sub>2</sub>                      |       |            |
| 23 | Ethanolamine           | 3.13 (d)                | CH <sub>2</sub>                                       |       | COSY       |
| 24 | Choline                | 3.20(s);3.52(m);4.07(m) | CH <sub>3</sub> ;N-CH <sub>2</sub> ;O-CH <sub>2</sub> | 53.19 | COSY ,HSQC |
| 25 | Phosphocholine         | 3.22(s);3.59(m)         | CH <sub>3</sub> ; N-CH <sub>2</sub> ;                 | 71.97 | HSQC       |
| 27 | Glycerophosphocholine  | 3.68(m)                 | N-CH <sub>2</sub> &HO-CH <sub>2</sub>                 |       |            |
| 28 | Trimethylamine-N-oxide | 3.27(s)                 | CH <sub>3</sub>                                       |       |            |
| 29 | Taurine                | 3.27(t);3.42(t)         | S-CH <sub>2</sub> ;N-CH <sub>2</sub>                  | 35.95 | HSQC       |
| 30 | Betaine                | 3.27(s); 3.89(s)        | CH <sub>3</sub> ; CH <sub>2</sub>                     | 61.34 | COSY,HSQC  |
| 31 | Inositol               | 3.28(t);3.54(dd)        | CH(2); CH(4, 6);                                      | 75.04 | HSQC       |
| 32 | Scyllo-Inositol        | 3.37(s)                 | CH                                                    |       |            |
| 33 | Glycine                | 3.56 (s)                | CH <sub>2</sub>                                       | 43.27 | HSQC       |
| 34 | Glycerol               | 3.64 (m); 3.77 (m)      | CH <sub>2</sub> ;CH                                   | 72.44 | HSQC       |
| 35 | Adenosine              | 6.10(d);8.25(s);8.35(s) | 1-C'H;8-CH;2-CH                                       |       |            |
| 36 | $\beta$ -glucose       | 4.63 (d)                | 1-CH                                                  | 96.41 | HSQC       |
| 37 | $\alpha$ -glucose      | 5.23 (d)                | 1-CH                                                  | 92.16 | HSQC       |
| 39 | Allantoin              | 5.39(s)                 | CH                                                    |       |            |
| 40 | Uridine                | 5.91(d);7.87(d)         | CH(2);CH(11)                                          |       |            |
| 42 | Uracil                 | 5.80(d); 7.53(d)        | CH(5); CH(6)                                          |       |            |
| 43 | Guanosine              | 5.90(s);                | CH(2);                                                |       |            |
| 44 | Cytidine               | 6.06(d); 7.84(d)        | CH(2); CH(11)                                         |       |            |
| 45 | Fumarate               | 6.52s)                  | CH                                                    |       |            |
| 46 | Tyrosine               | 6.89(d); 7.19(d)        | m-CH; o-CH                                            |       | COSY       |



|    |               |                                         |                              |        |      |
|----|---------------|-----------------------------------------|------------------------------|--------|------|
| 47 | Histidine     | 7.11(s), 7.92(s)                        | 2-CH, 4-CH                   |        |      |
| 48 | Tryptophan    | 7.19(m);7.31(s);<br>7.60(m);            | CH(8); CH(6);<br>CH(7);      | 129.55 | HSQC |
| 49 | Phenylalanine | 7.38(m),7.43(m)                         | ,3,5-CH,4-CH                 |        |      |
| 50 | Nicotinamide  | 7.59(dd);8.24(dd);<br>8.72(dd); 8.94(s) | CH(5);CH(4);CH(6)<br>; CH(2) |        | COSY |
| 51 | Xanthine      | 7.93(s)                                 | CH                           |        |      |
| 52 | Hypoxanthine  | 8.19(s); 8.21(s)                        | CH(2); CH(7)                 |        |      |
| 53 | NMN           | 8.31(t); 9.00(d)                        | 6-CH;2-CH                    |        |      |
| 54 | Formate       | 8.46(s)                                 | CH                           |        |      |

<sup>a</sup> Multiplicity for <sup>1</sup>H resonances: s: single; d: doublet; t: triplet; q: quartet; m: multiplet.

<sup>b</sup> NMN: nicotinamide mononucleotide

All of <sup>1</sup>H NMR spectra of tissue samples were phased and baseline corrected by MestReNova v9.0.1 software (Mestrelab Research, Santiago de Compostella, Spain). In <sup>1</sup>H NMR spectra, a single peak from TSP at 0.0 ppm was referenced. In order to overcome peak-shift problem, all spectra were also peak-aligned. After removing the chemical shift range of  $\delta$  4.70-5.2 ppm to exclude the influence of water, the spectra were segmented across the region of 0.5-9.0 ppm at  $\delta$  0.01 intervals. To compensate for significant concentration differences between samples, the integral values from every spectrum were normalized to a sum of all of integrals in a spectrum, and then the data matrices were formed for further multivariate analysis.

The <sup>1</sup>H NMR spectral data was introduced into SIMCA-P14.1 (Umetrics, Sweden) for multivariate analysis. Prior to multivariate analysis, the Pareto-scaling was used to reduce the influence of artefacts and noise in the models. In this study, a principal component analysis (PCA) was firstly conducted for a natural separation among all groups by visual inspection of the score plots. And then supervised orthogonal projection to latent structures discriminant analysis (OPLS-DA) was used to maximize difference between groups. Meanwhile, the quality of OPLS-DA model was assessed by parameters for model fitness (R<sup>2</sup>) and predictive ability (Q<sup>2</sup>). To acquire the potential variables for differentiation, the corresponding S-plot of OPLS-DA model was conducted. Finally, according to the variable importance in the project (VIP $\geq$ 1.00) of the

established OPLS-DA model and an independent-sample t-test ( $p < 0.05$ ) using (OriginProver.8.1), the potential biomarkers were extracted.

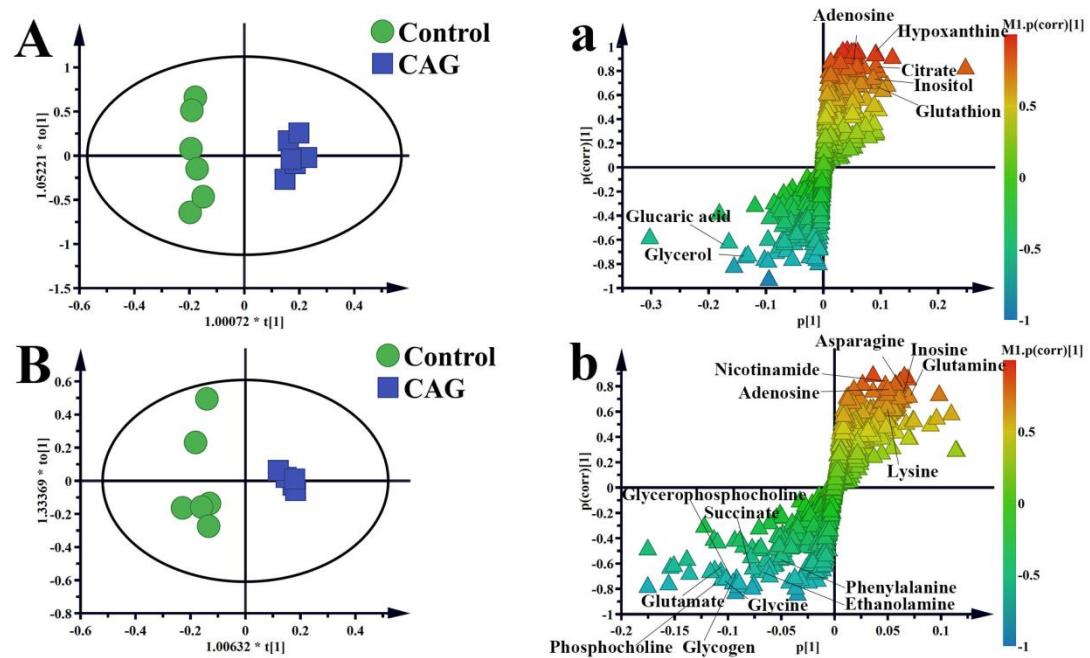

**Figure.S6** OPLS-DA scores plots and corresponding S-plots from the CAG rats and the controls with electro-acupuncture treatment on the stomach meridian acupoints in Liver (A and a,  $R^2X$  (cum) =0.848,  $R^2Y$ (cum) =0.986,  $Q^2$ (cum) =0.925)and Kidney (B and b,  $R^2X$  (cum) =0.573,  $R^2Y$ (cum) =0.969,  $Q^2$ (cum) =0.61).

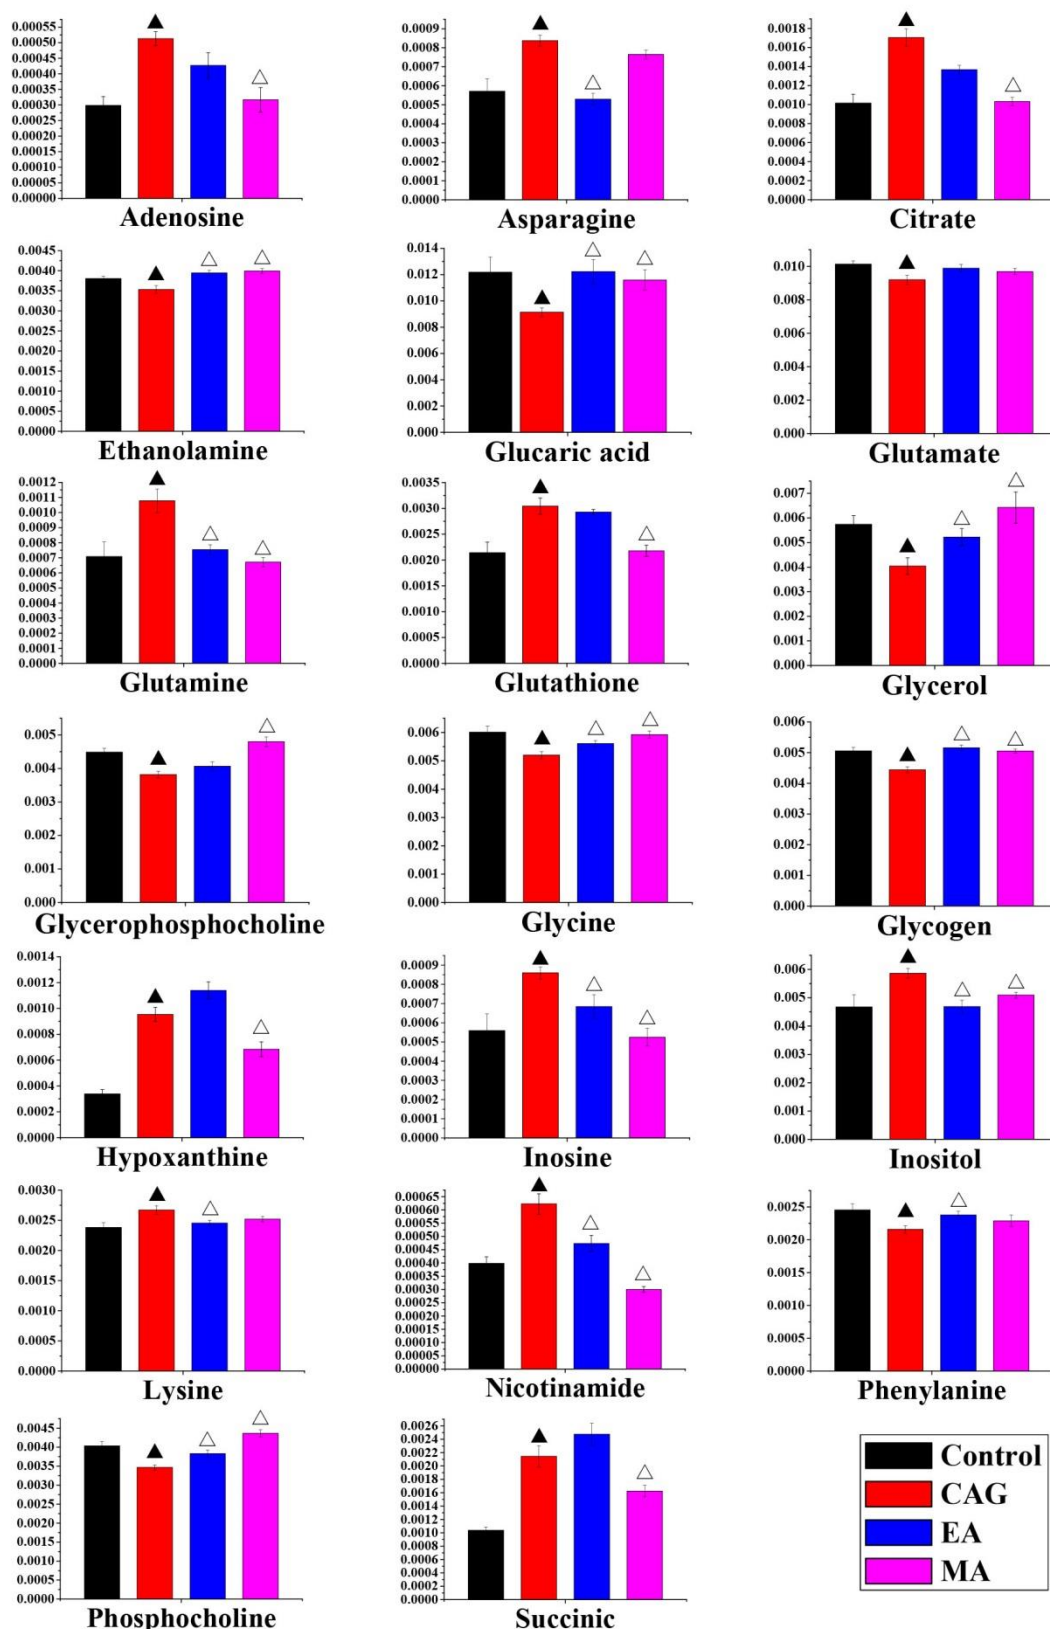

**Figure.S7** Relative abundance (mean  $\pm$  S.D.) of characteristic metabolites from serum and tissues in six groups (n=6). (Control, control rats; CAG, chronic atrophic gastritis rats; EA, CAG rats with electro-acupuncture treatment on the stomach meridian acupoints; MA group, CAG rats with

moxibustion treatment on the stomach meridian acupoints.) (▲ means a statistical significance  $p < 0.05$  when compared with the control group; Δ means a statistical significance  $p < 0.05$  when compared with the CAG group.) Compared with the controls, It was showed some changes in levels of metabolites in CAG rats as follows: a) for liver sample, levels of citrate, inositol, glutathione, hypoxanthine and adenosine were increased, whereas the levels of glycerol and glucaric acid were decreased. b) in kidney, the levels of adenosine, nicotinamide, glutamine, inosine, asparagine and lysine were increased, while levels of succinate, glutamate, glycine, glycerophosphocholine, glycogen, phosphocholine, phenylalanine and ethanolamine were decreased.

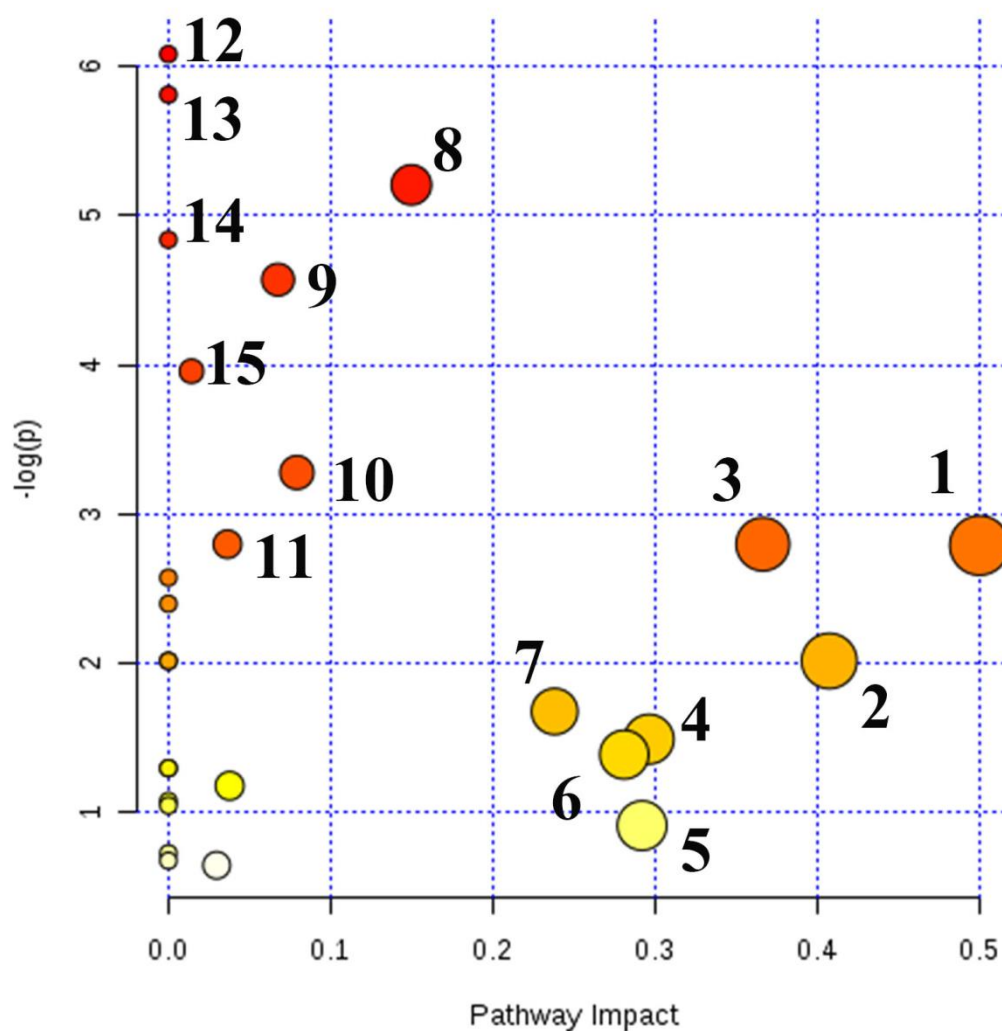

**Figure.S8** The overview of metabolic pathways related to electro-acupuncture and moxibustion treatment on CAG rats from KEGG. (1, Phenylalanine, tyrosine and tryptophan biosynthesis; 2,

Phenylalanine metabolism; 3, Glutathione metabolism; 4, Glyoxylate and dicarboxylate metabolism; 5, Glycine, serine and threonine metabolism; 6, Glycerolipid metabolism; 7, Nicotinate and nicotinamide metabolism; 8, Alanine, aspartate and glutamate metabolism; 9, Glycerophospholipid metabolism; 10, Citrate cycle (TCA cycle); 11, Galactose metabolism; 12, Glutamine and glutamate metabolism; 13, lysine metabolism; 14, Aminoacyl-tRNA biosynthesis; 15, Purine metabolism.)
