# Supplementary material for: Difference of Liver and Kidney Metabolic Profiling in Chronic Atrophic Gastritis Rats between Acupuncture and Moxibustion Treatment
Source: Evid Based Complement Alternat Med. 2018 Sep 17;2018:6030929. doi: 10.1155/2018/6030929 (PMC6166372; doi:10.1155/2018/6030929)
Supplement: Supplementary Materials — In order to provide complementary information, there are some materials shown in supplementary materials as follows. Figure S1. The location of acupoints and corresponding nonacupoints for Zusanli (ST 36, located 5 mm below the fibular head and lateral to the anterior tubercle of the tibia) on rats (a); the location of acupoints and corresponding nonacupoints for Liangmen (ST 21, located 5 mm horizontally to the spot above 2cm from navel) on rats (b); moxa cones (c); stainless steel acupuncture needles (d). Figure S2. Portion of the 1H−1H COSY 600 MHz spectrum of liver metabolites. Identified metabolites: 1, Isoleucine; 3, Valine; 5, 3-Hydroxybutyrate; 7, Lactate; 8, Alanine; 9, Lysine; 10, Acetate; 12, Glutamine; 23, Ethanolamine; 24, Choline; 30, Betaine; 31, Inositol; 35, Adenosine; 38, Glycogen; 40, Uridine; 41, Inosine; 43, Uridine; 44, Cytidine; 46, Tyrosine; 48, Tryptophan; 50, Nicotinamide. Figure S3. Portion of the 1H−13C HSQC 600 MHz spectrum of liver metabolites. Identified metabolites: 1, Isoleucine; 3, Valine; 5, 3-Hydroxybutyrate; 7, Lactate; 8, Alanine; 9, Lysine; 10, Acetate; 11, Glutamate; 12, Glutamine; 14, Glutathione; 15, Succinate; 18, Dimethylamine; 20, N-methylhydantoin; 21, Creatine; 23, Ethanolamine; 24, Choline; 25, Phosphocholine; 26, Taurine; 27, Glycerophosphocholine; 30, Betaine; 31, Inositol; 34, Glycerol; 35, Adenosine; 36, β-glucose; 37, α-glucose; 38, Glycogen; 41, Inosine; 43, Uridine. Figure S4. Portion of the 1H−1H COSY 600 MHz spectrum of kidney metabolites. Identified metabolites: 1, Isoleucine; 3, Valine; 4, Ornithine; 5, 3-Hydroxybutyrate; 7, Lactate; 8, Alanine; 9, Lysine; 17, Aspartate; 18, Dimethylamine; 23, Ethanolamine; 24, Choline; 30, Betaine; 46, Tyrosine; 48, Tryptophan; 50, Nicotinamide. Figure S5. Portion of the 1H−13C HSQC 600 MHz spectrum of kidney metabolites. Identified metabolites: 1, Isoleucine; 2, Leucine; 3, Valine; 4, Ornithine; 5, 3-Hydroxybutyrate; 7, Lactate; 8, Alanine; 9, Lysine; 10, Acetate; 12, Glut [file 6030929.f1.zip]

Archive with 14 entries (14 files):
- Figure.S1_ECAM_2472192.psd
- Figure.S1_ECAM_2472202.psd
- Figure.S2_ECAM_2472193.psd
- Figure.S2_ECAM_2472203.psd
- Figure.S3_ECAM_2472194.psd
- Figure.S3_ECAM_2472204.psd
- Figure.S4_ECAM_2472195.psd
- Figure.S4_ECAM_2472205.psd
- Figure.S5_ECAM_2472196.psd
- Figure.S5_ECAM_2472206.psd
- Figure.S6_ECAM_2472207.psd
- Figure.S7_ECAM_2472208.psd
- Figure.S8_ECAM_2472209.psd
- mat.6030929.v2.pdf
